# Supplementary material for: Diagnostic delay in multiple myeloma: the legacy of the COVID-19 pandemic.
Source: Research Square preprint supplement (doi:10.21203/rs.3.rs-2230271/v1), 2022-11-18
Supplement: Supplementary file 1 [file ae025a8bc903d02f0b3bd3cd.pdf]

- 1 **Table 2.** Cause of death for patients diagnosed from 01 January 2019 - 31 January 2020
- 2 (Pre-COVID, n=110) and those diagnosed from 01 February 2020- 31 July 2021 (Post-
- 3 COVID, n=213).

|                                          | Pre-COVID        | Post-COVID       |
|------------------------------------------|------------------|------------------|
| <b>Mortality: <i>N</i> (%)</b>           | <b>27 (24.5)</b> | <b>32 (15.0)</b> |
| <b>Progressive Disease: <i>N</i> (%)</b> | <b>9 (33.3)</b>  | <b>17 (53.1)</b> |
| <b>Infection:</b>                        |                  |                  |
| <b>Sepsis</b>                            | <b>3 (11.1)</b>  | <b>2 (6.2)</b>   |
| <b>COVID-19</b>                          | <b>5 (18.5)</b>  | <b>7 (21.9)</b>  |
| <b>Cardio-respiratory Failure</b>        | <b>6 (22.2)</b>  | <b>1 (3.1)</b>   |
| <b>Cerebrovascular Accident</b>          | <b>0 (0.0)</b>   | <b>1 (3.1)</b>   |
| <b>Second Primary Malignancy</b>         | <b>1 (3.7)</b>   | <b>0 (0.0)</b>   |
| <b>Upper GI Bleed</b>                    | <b>0 (0.0)</b>   | <b>1 (3.1)</b>   |
| <b>Unknown</b>                           | <b>3 (11.1)</b>  | <b>3 (0.9)</b>   |

4
